# Supplementary material for: Ureaplasma antigenic variation beyond MBA phase variation: DNA inversions generating chimeric structures and switching in expression of the MBA N-terminal paralogue UU172
Source: PubMed Central journal article supplement (PMC3047005; doi:10.1111/j.1365-2958.2010.07474.x), 2011-02
Supplement: mmi0079-0663-SD1.pdf [file mmi0079-0663-SD1.pdf]

| Species                       | serovar | strain<br>[ATCC] | [U172] | locus tag                            | GenBank                    | NCBI reference<br>Sequence     | Description                                                                                                                                                                                                       |
|-------------------------------|---------|------------------|--------|--------------------------------------|----------------------------|--------------------------------|-------------------------------------------------------------------------------------------------------------------------------------------------------------------------------------------------------------------|
| <i>Ureaplasma parvum</i>      | 1       | 27813            | x      | <a href="#">UPA1_D0001</a>           | <a href="#">EDT48708.1</a> | <a href="#">ZP_02691484.2</a>  | putative lipoprotein                                                                                                                                                                                              |
| <i>Ureaplasma parvum</i>      | 1       | 27813            | xxx    | <a href="#">UPA1_G0402</a>           | <a href="#">EDT49018.1</a> | <a href="#">ZP_02931659.1</a>  | MBA N-terminal paralog of phase variable lipoprotein                                                                                                                                                              |
| <i>Ureaplasma urealyticum</i> | 2       | 27814            | xxx    | <a href="#">UUR2_0166</a>            | <a href="#">EEH02482.1</a> | <a href="#">ZP_03771915.1</a>  | conserved hypothetical protein                                                                                                                                                                                    |
| <i>Ureaplasma parvum</i>      | 3       | 700970           | xxx    | <a href="#">UU172</a>                | <a href="#">AAF30579.1</a> | <a href="#">NP_078004.1</a>    | MBA N-terminal paralog of phase variable lipoprotein                                                                                                                                                              |
| <i>Ureaplasma urealyticum</i> | 3       | 27815            | xxx    | <a href="#">UPA3_0179</a>            | <a href="#">ACA33003.1</a> | <a href="#">YP_001752254.1</a> | MBA N-terminal paralog of phase variable lipoprotein                                                                                                                                                              |
| <i>Ureaplasma parvum</i>      | 3       | 27815            |        | <a href="#">uu172C</a>               | <a href="#">CBI70477.1</a> |                                | putative lipoprotein                                                                                                                                                                                              |
| <i>Ureaplasma parvum</i>      | 3       | M14              | xxx    | <a href="#">uu172</a>                | <a href="#">CBI70480.1</a> |                                | MBA N-terminal paralog of phase variable lipoprotein                                                                                                                                                              |
| <i>Ureaplasma parvum</i>      | 3       | V397             |        | <a href="#">uu172C</a>               | <a href="#">CBI70484.1</a> |                                | putative lipoprotein                                                                                                                                                                                              |
| <i>Ureaplasma parvum</i>      | 3       | DR1              | xxx    | <a href="#">uu172</a>                | <a href="#">CBI70486.1</a> |                                | MBA N-terminal paralog of phase variable lipoprotein                                                                                                                                                              |
| <i>Ureaplasma parvum</i>      | 3       | V892             | xxx    | <a href="#">uu172N_171_144b_172C</a> | <a href="#">CBI70488.1</a> |                                | MBA N-terminal paralog of phase variable lipoprotein                                                                                                                                                              |
| <i>Ureaplasma parvum</i>      | 3       | V892             | x      | <a href="#">uu172N</a>               | <a href="#">CBI70489.1</a> |                                | MBA N-terminal paralog of phase variable lipoprotein                                                                                                                                                              |
| <i>Ureaplasma parvum</i>      | 3       | V892             |        | <a href="#">uu172C</a>               | <a href="#">CBI70490.1</a> |                                | putative lipoprotein                                                                                                                                                                                              |
| <i>Ureaplasma urealyticum</i> | 4       | 27816            | xxx    | <a href="#">UUR4_0061</a>            | <a href="#">EDY74622.1</a> | <a href="#">ZP_03205858.1</a>  | putative lipoprotein                                                                                                                                                                                              |
| <i>Ureaplasma urealyticum</i> | 5       | 27817            | xxx    | <a href="#">UUR5_G0187</a>           | <a href="#">EDU06542.1</a> | <a href="#">ZP_02964637.1</a>  | putative lipoprotein                                                                                                                                                                                              |
| <i>Ureaplasma parvum</i>      | 6       | 27818            | xxx    | <a href="#">UPA6_A0161</a>           | <a href="#">EDU19008.1</a> | <a href="#">ZP_02971599.1</a>  | putative lipoprotein                                                                                                                                                                                              |
| <i>Ureaplasma urealyticum</i> | 7       | 27819            |        | <a href="#">UUR7_0167</a>            | <a href="#">EDU57041</a>   | <a href="#">ZP_02997003.1</a>  | conserved hypothetical protein                                                                                                                                                                                    |
| <i>Ureaplasma urealyticum</i> | 8       | 27618            | xxx    | <a href="#">UUR8_0167</a>            | <a href="#">EEH01688.1</a> | <a href="#">ZP_03772454.1</a>  | conserved hypothetical protein                                                                                                                                                                                    |
| <i>Ureaplasma urealyticum</i> | 9       | 33175            | xxx    | <a href="#">UUR9_0558</a>            | <a href="#">EDX53885.1</a> | <a href="#">ZP_03079775.1</a>  | putative lipoprotein                                                                                                                                                                                              |
| <i>Ureaplasma urealyticum</i> | 10      | 33699            |        | <a href="#">UUR10_0163</a>           | <a href="#">ACI59953.1</a> | <a href="#">YP_002284568.1</a> | hypothetical protein                                                                                                                                                                                              |
| <i>Ureaplasma urealyticum</i> | 11      | 33695            | xxx    | <a href="#">UUR11_0162</a>           | <a href="#">EDU67029.1</a> | <a href="#">ZP_03004006.1</a>  | putative lipoprotein                                                                                                                                                                                              |
| <i>Ureaplasma urealyticum</i> | 12      | 33696            | xxx    | <a href="#">UUR12_A0163</a>          | <a href="#">EDX53110.1</a> | <a href="#">ZP_03004175.1</a>  | putative lipoprotein                                                                                                                                                                                              |
|                               |         |                  |        |                                      |                            |                                | Part of the UU172-UU171-UU144 phase variable element. This is similar to the carboxyl terminus of UU172; however the amino terminus of gene in this serovar has inverted and is now linked to the UU171 ortholog. |
| <i>Ureaplasma urealyticum</i> | 13      | 33698            |        | <a href="#">UUR13_0347</a>           | <a href="#">EDT49654</a>   | <a href="#">ZP_02931879.1</a>  |                                                                                                                                                                                                                   |
| <i>Ureaplasma parvum</i>      | 14      | 33697            | xxx    | <a href="#">UPA14_G0051</a>          | <a href="#">EDT87500.1</a> | <a href="#">ZP_02958170.1</a>  | putative lipoprotein                                                                                                                                                                                              |

x: only U172N  
xxx: full length with U172N

| Species                       | serovar | strain [ATCC] | [U171/144] | locus tag                      | GenBank                    | NCBI reference Sequence        | Description                                          |
|-------------------------------|---------|---------------|------------|--------------------------------|----------------------------|--------------------------------|------------------------------------------------------|
| <i>Ureaplasma parvum</i>      | 1       | 27813         |            | <a href="#">UPA1_G0401</a>     | <a href="#">EDT49176.1</a> | <a href="#">ZP_02691092.1</a>  | conserved hypothetical protein                       |
| <i>Ureaplasma parvum</i>      | 3       | M14           | xxx        | <a href="#">uu172N_171_144</a> | <a href="#">CBI70478.1</a> |                                | MBA N-terminal paralog of phase variable lipoprotein |
| <i>Ureaplasma parvum</i>      | 3       | V890          | x          | <a href="#">uu172N</a>         | <a href="#">CBI70482.1</a> |                                | MBA N-terminal paralog of phase variable lipoprotein |
| <i>Ureaplasma parvum</i>      | 3       | V397          | x          | <a href="#">uu172N</a>         | <a href="#">CBI70483.1</a> |                                | MBA N-terminal paralog of phase variable lipoprotein |
| <i>Ureaplasma parvum</i>      | 3       | DR1           | xxx        | <a href="#">uu172N_171_144</a> | <a href="#">CBI70487.1</a> |                                | MBA N-terminal paralog of phase variable lipoprotein |
| <i>Ureaplasma urealyticum</i> | 5       | 27817         |            | <a href="#">UUR5_G0186</a>     | <a href="#">EDU06485.1</a> | <a href="#">ZP_02554791.1</a>  | putative lipoprotein                                 |
| <i>Ureaplasma parvum</i>      | 6       | 27818         |            | <a href="#">UPA6_A0160</a>     | <a href="#">EDU18921.1</a> | <a href="#">ZP_02554392.1</a>  | conserved hypothetical protein                       |
| <i>Ureaplasma urealyticum</i> | 7       | 27819         | xxx        | <a href="#">UUR7_0166</a>      | <a href="#">EDU56898.1</a> | <a href="#">ZP_02570029.2</a>  | putative lipoprotein                                 |
| <i>Ureaplasma urealyticum</i> | 8       | 27618         |            | <a href="#">UUR8_0166</a>      | <a href="#">EEH01821.1</a> | <a href="#">ZP_03772587.1</a>  | conserved hypothetical protein                       |
| <i>Ureaplasma urealyticum</i> | 9       | 33175         |            | <a href="#">UUR9_0559</a>      | <a href="#">EDX53889.1</a> | <a href="#">ZP_03079779.1</a>  | conserved hypothetical protein                       |
| <i>Ureaplasma urealyticum</i> | 10      | 33699         | xxx        | <a href="#">UUR10_0162</a>     | <a href="#">ACI60016.1</a> | <a href="#">YP_002284567.1</a> | multiple banded antigen                              |
| <i>Ureaplasma urealyticum</i> | 11      | 33695         |            | <a href="#">UUR11_0161</a>     | <a href="#">EDU66978.1</a> | <a href="#">ZP_02556791.1</a>  | putative lipoprotein                                 |
| <i>Ureaplasma urealyticum</i> | 13      | 33698         | xxx        | <a href="#">UUR13_0348</a>     | <a href="#">EDT49608.1</a> | <a href="#">ZP_02695322.2</a>  | putative lipoprotein                                 |
| <i>Ureaplasma parvum</i>      | 14      | 33697         |            | <a href="#">UPA14_G0050</a>    | <a href="#">EDT87644.1</a> | <a href="#">ZP_02689934.1</a>  | conserved hypothetical protein                       |

x: only U172N  
xxx: full length with U172N

| Species                  | serovar | strain [ATCC] | [U171] | Locus tag                  | GenBank                    | NCBI reference Sequence        | Description                                          |
|--------------------------|---------|---------------|--------|----------------------------|----------------------------|--------------------------------|------------------------------------------------------|
| <i>Ureaplasma parvum</i> | 1       | 27813         |        | <a href="#">UPA1_D0002</a> | <a href="#">EDT48707.1</a> | <a href="#">ZP_02691485.1</a>  | conserved hypothetical protein                       |
| <i>Ureaplasma parvum</i> | 3       | 700970        |        | <a href="#">UU171</a>      | <a href="#">AAF30578.1</a> | <a href="#">NP_078003.1</a>    | lipoprotein pseudogene                               |
| <i>Ureaplasma parvum</i> | 3       | 27815         |        | <a href="#">UPA3_0178</a>  | <a href="#">ACA33100.1</a> | <a href="#">YP_001752253.1</a> | lipoprotein pseudogene                               |
| <i>Ureaplasma parvum</i> | 3       | 27815         | xxx    | <a href="#">uu172N_171</a> | <a href="#">CBI70476.1</a> |                                | MBA N-terminal paralog of phase variable lipoprotein |

xxx: full length with U172N

| Species                       | serovar | strain<br>[ATCC] | [U144] | Locus tag                   | GenBank                    | NCBI reference<br>Sequence     | Description                    |
|-------------------------------|---------|------------------|--------|-----------------------------|----------------------------|--------------------------------|--------------------------------|
| <i>Ureaplasma urealyticum</i> | 2       | 27814            |        | <a href="#">UUR2_0163</a>   | <a href="#">EEH02080.1</a> | <a href="#">ZP_03771513.1</a>  | conserved hypothetical protein |
| <i>Ureaplasma parvum</i>      | 3       | 700970           |        | <a href="#">UU144</a>       | <a href="#">AAF30550.1</a> | <a href="#">NP_077975.1</a>    | Lipoprotein pseudogene         |
| <i>Ureaplasma parvum</i>      | 3       | 27815            |        | <a href="#">UPA3_0152</a>   | <a href="#">ACA33189.1</a> | <a href="#">YP_001752227.1</a> | Lipoprotein pseudogene         |
| <i>Ureaplasma parvum</i>      | 3       | M14              |        | <a href="#">uu144</a>       | <a href="#">CBI70479.1</a> |                                | putative lipoprotein           |
| <i>Ureaplasma parvum</i>      | 3       | V890             |        | <a href="#">uu144</a>       | <a href="#">CBI70481.1</a> |                                | putative lipoprotein           |
| <i>Ureaplasma parvum</i>      | 3       | DR1              |        | <a href="#">uu144</a>       | <a href="#">CBI70485.1</a> |                                | putative lipoprotein           |
| <i>Ureaplasma urealyticum</i> | 4       | 27816            |        | <a href="#">UUR4_0064</a>   | <a href="#">EDY74691.1</a> | <a href="#">ZP_03205927.1</a>  | conserved hypothetical protein |
| <i>Ureaplasma urealyticum</i> | 12      | 33696            |        | <a href="#">UUR12_A0160</a> | <a href="#">EDX53304.1</a> | <a href="#">ZP_02557340.1</a>  | conserved domain protein       |

[U172]: orthologs of UU172 of *U. parvum* serovar 3 (ATCC 700970)

[U171]: orthologs of UU171 of *U. parvum* serovar 3 (ATCC 700970)

[U144]: orthologs of UU144 of *U. parvum* serovar 3 (ATCC 700970)

[U171/144]: : orthologs of UUR10\_0162 of *U. urealyticum* serovar 10 (ATCC 33699)

pink: this study

**Table S2** List of major ORFs appearing in the UU172 element of all 14 *Ureaplasma* serovars.

| Primer no. and designation |            | Primer sequence <sup>a</sup>           | Localization 5'-3' | Amino acids of ORF | Fusion protein | Pab <sup>b</sup> |
|----------------------------|------------|----------------------------------------|--------------------|--------------------|----------------|------------------|
| 1                          | U144f      | <b>TTGGATCC</b> ATTGAACAAAATCAT        | 188918 – 188904    | 38 – 243           | U144           | α-U144           |
| 2                          | U144r      | GGA <b>AGCTT</b> ATTTTTTATTTACTAC      | 188298 – 188315    |                    |                |                  |
| 3                          | U171f      | <b>TTGGATCC</b> GTGATTGCAAATAAAATA     | 210003 – 209986    | 1 – 175            | U171           | α-U171           |
| 4                          | U171r      | TCGA <b>AGCTT</b> AATCAATTTCTAAACCAT   | 209475 – 209492    |                    |                |                  |
| 5                          | U172Nf     | TC <b>GGATCC</b> TCAAATACAAATATTAATCT  | 210468 - 210488    | 31 – 132           | U172N          | α-U172N          |
| 6                          | U172Nr     | CGA <b>AGCTT</b> AAACTAATGCTTCTGTTTTTA | 210774 – 210754    |                    |                |                  |
| 7                          | U172Cf1    | TC <b>GGATCC</b> GATCAAAAATTAGAACCA    | 210825 – 210842    | 150 – 499          | U172C          | α-U172C          |
| 8                          | U172CrUGG2 | TCTGCTAGCA <b>ACA</b> ACGTAATCCTAAAAT  | 211126 – 211098    |                    |                |                  |
| 9                          | U172Cf2    | TTAGGATTACGTTGATT <b>GCTAGC</b>        | 211101 – 211123    |                    |                |                  |
| 10                         | U172Cr2    | ATTGTATAAATTAATGTTGC                   | 211388 – 211368    |                    |                |                  |
| 11                         | U172CfUGG3 | GGCTTTGAC <b>TGG</b> TCAACATTATTA      | 211389 – 211412    |                    |                |                  |
| 12                         | U172Cr3    | ATATTCAGCAATTTCTAAACGC                 | 211547 – 211526    |                    |                |                  |
| 13                         | U172CfUGG4 | CCAAAAGAT <b>TGG</b> AACACTAGCAA       | 211548 – 211570    |                    |                |                  |
| 14                         | U172Cr4    | CGCG <b>TGCACT</b> ATTTTTTATTATTG      | 211876 – 211861    |                    |                |                  |
|                            |            |                                        |                    | <b>Probe name</b>  |                |                  |
| 15                         | #171f      | TGCTATTAGTGCTACTGAA                    | 209860 – 209860    | #171               |                |                  |
| 16                         | #171r      | CTACCCGGGAATTGCTAGAAACCA               | 209407 – 209421    |                    |                |                  |
| 17                         | #172Nf     | GCAATGTCATTAAGTGCGAT                   | 210408 – 210427    | #171N              |                |                  |
| 18                         | #172Nr     | TAAAACTAATGCTTCTGTT                    | 210777 – 210758    |                    |                |                  |
| 19                         | #172Cf     | TACAACAATCATGAAAGCAA                   | 211178 – 211197    | #172C              |                |                  |
| 20                         | #172Cr     | GCATTACTACAGGATCTTCA                   | 211527 – 211508    |                    |                |                  |
| 21                         | #143f      | ACAAGATATGTTAGAAGCAAC                  | 184510 – 184490    | #143               |                |                  |
| 22                         | #143r      | TGTTGGATAATCGAACTATTG                  | 184092 – 184112    |                    |                |                  |
| 23                         | #143r_3'   | TTCATTCCATCATCATCGTAGA                 | 184949 – 184971    |                    |                |                  |
| 24                         | #144r      | AGCCATATGATACTTAGCAT                   | 188559 – 188578    |                    |                |                  |
| 25                         | #143r_5'   | TACTCCACCGAATTTTCATCATT                | 187811 – 187833    |                    |                |                  |

**Table S3.** Primers and binding sites within the ORFs UU172, UU171, UU144 and UU143 of *U. parvum* serovar 3 strain ATCC 700970 used for synthesizing recombinant fusion proteins for generating polyclonal antibodies and for probe synthesis.

<sup>a</sup>Nucleotides in bold represent restriction sites *Bam*HI , *Hind*III, *Nhe*I or *Sal*I. Nucleotides in bold, italics and underlined represent TGA to TGG modifications.

<sup>b</sup>Pab, monospecific polyclonal antibody used for detection

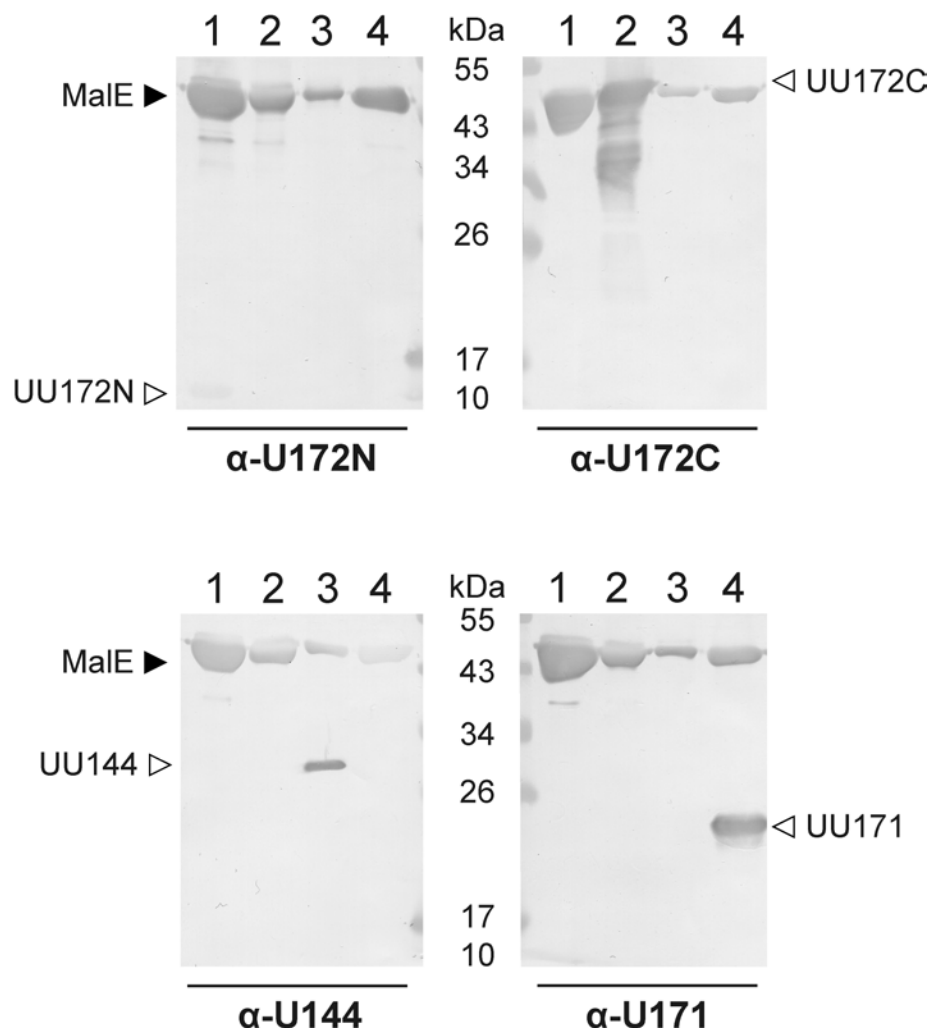

**Fig. S1** Western blot analyses of Factor Xa-treated MalE fusion-proteins.

Maltose binding protein (MalE) fusion-proteins (MalE-UU172N, MalE-UU172C, MalE-UU144 and MalE-UU171) were purified by affinity chromatography as described by the manufacturer (NewEnglandBiolabs). Fusion proteins were digested with Factor Xa and detected with the monospecific polyclonal antibodies (see **Table S3**) indicated below the blots. Lane 1, MalE-UU172N, lane 2, MalE-UU172C, lane 3, MalE-UU144 and lane 4, MalE-UU171.

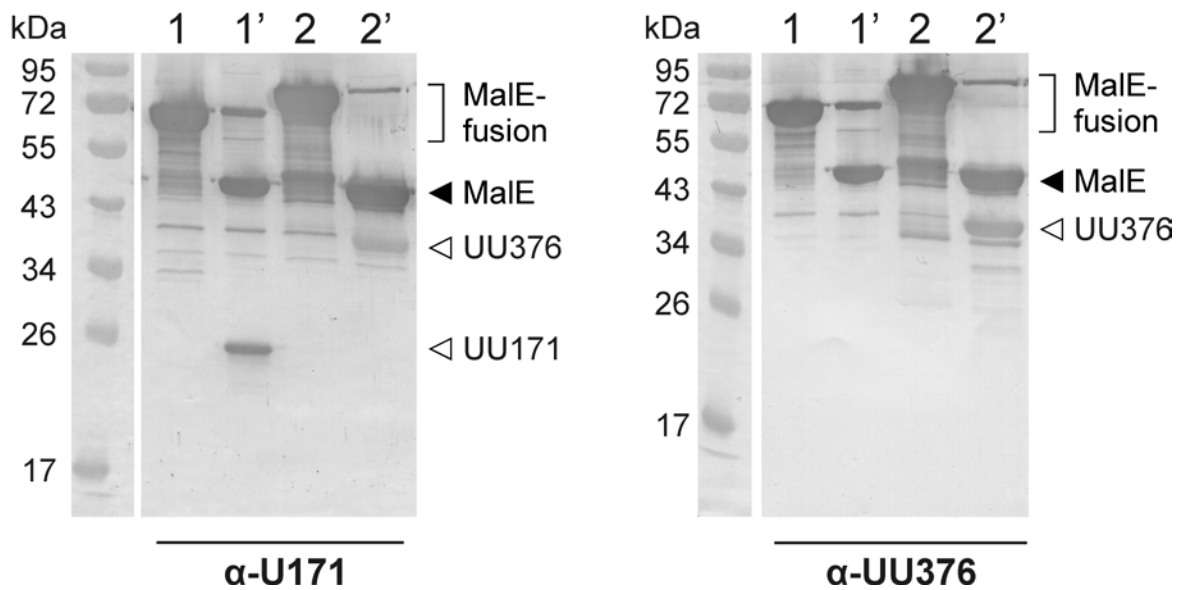

**Fig. S2** Cross-reaction of  $\alpha$ -UU171 with the UU376 protein.

Maltose binding protein (MalE) fusion-proteins (MalE-UU171 and MalE-UU376) were purified by affinity chromatography as described by the manufacturer (NewEnglandBiolabs). 2  $\mu$ g / lane was loaded with undigested (lanes 1 and 2) and Factor Xa treated (lanes 1' and 2') protein. Lanes 1 and 1', MalE-UU171 and lanes 2 and 2', MalE-UU376. Proteins were detected with the monospecific antisera indicated below the blots.

Reference for MalE-UU376 and  $\alpha$ -UU376: "[Zimmerman, C. U., Stiedl, T., Rosengarten, R. and Spergser, J. \(2009\) Alternate phase variation in expression of two major surface membrane proteins \(MBA and UU376\) of \*Ureaplasma parvum\* serovar 3. FEMS Microbiol Lett 292: 187-193.](#)"

**A**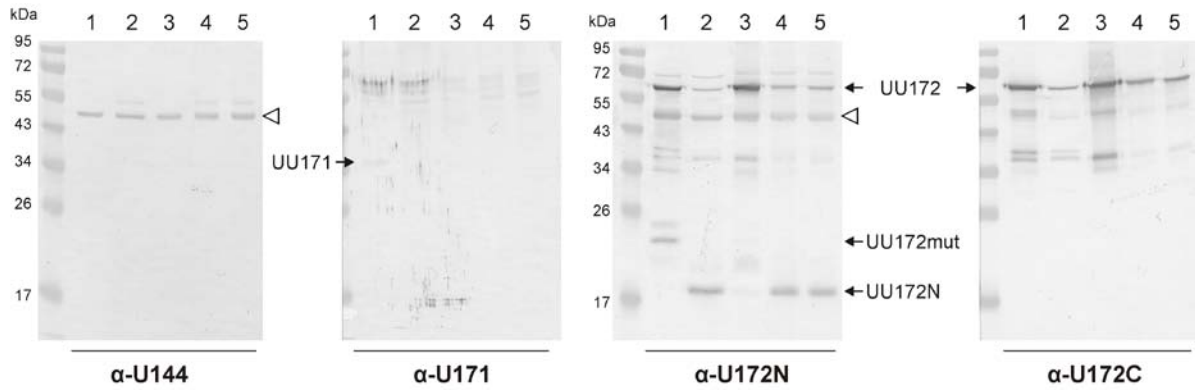**B**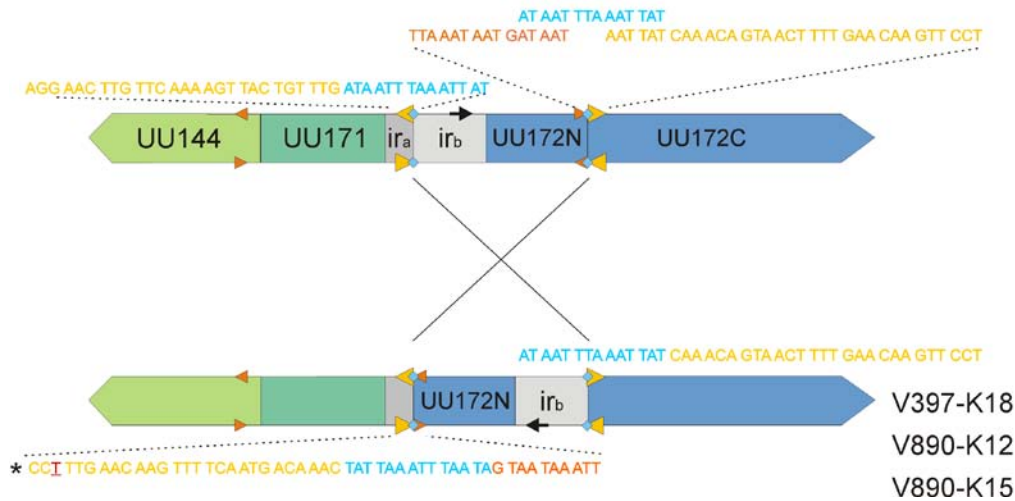

**Fig. S3** Western blot analyses of total *Ureaplasma* cell protein and schematic illustration of DNA inversion. **A.** Western blot analysis with total cell protein of *U. parvum* serovar 3 clonal variants: lane 1, 27815<sup>T</sup>-K5; lane 2, V397-K18; lane 3, V890-K2; lane 4, V890-K12; lane 5, V890-K15. Proteins were detected with monospecific Pabs (see **Table S3**) indicated below the blots. Open triangle: background bands in the hydrophilic phases which were already detectable with pre-immune sera (**Fig. S6**). **B.** Schematic illustration of DNA inversion in the UU172 element of clonal variants V397-K18, V890-K12 and K15, which lead to the expression of UU172N. Nucleotide in red and underlined: insertion of an additional thymidine leading to a nonsense mutation and resulting in a stop codon (\*) in the 3' region of UU172N. Black arrow: potential promoter of the UU172 gene locus. *ir<sub>a</sub>* and *ir<sub>b</sub>*: intergenic spacer regions. Triangles and diamonds represent inverted repeat regions, where the diamond indicates a palindromic sequence (sequence in blue).

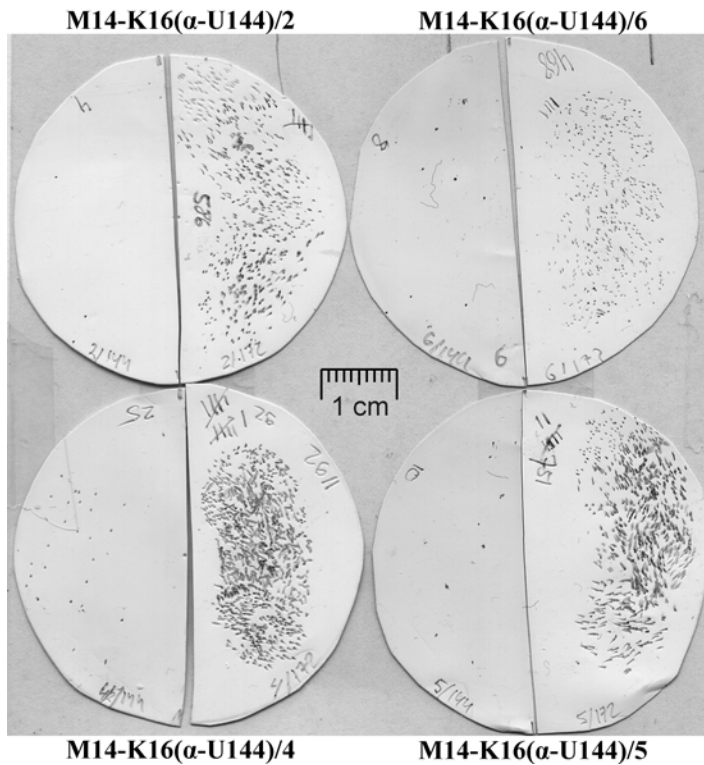

**Fig S4** Detection of UU171/144 expressing revertants by colony immuno blot.

Over night cultures of clonal lineages (clones 2, 4, 5, 6) from the third passage of  $\alpha$ -U144 treated M14-K14 were diluted and plated onto UPM agar. Colony lifts were detected with  $\alpha$ -U144 and  $\alpha$ -U172C and  $\alpha$ -rabbit IgG (horseradish peroxidase conjugated). Colonies were marked with pencil.

| Clonal variant              | Number of Colonies detected with $\alpha$ -U144 | Number of Colonies detected with $\alpha$ -U172C | Total positive | revertants [%] |
|-----------------------------|-------------------------------------------------|--------------------------------------------------|----------------|----------------|
| M14-K16 ( $\alpha$ -U144)/2 | 4                                               | 586                                              | 590            | 0.7            |
| M14-K16 ( $\alpha$ -U144)/4 | 25                                              | 1,192                                            | 1,217          | 2              |
| M14-K16 ( $\alpha$ -U144)/5 | 10                                              | 751                                              | 761            | 1.3            |
| M14-K16 ( $\alpha$ -U144)/6 | 6                                               | 468                                              | 474            | 1.2            |



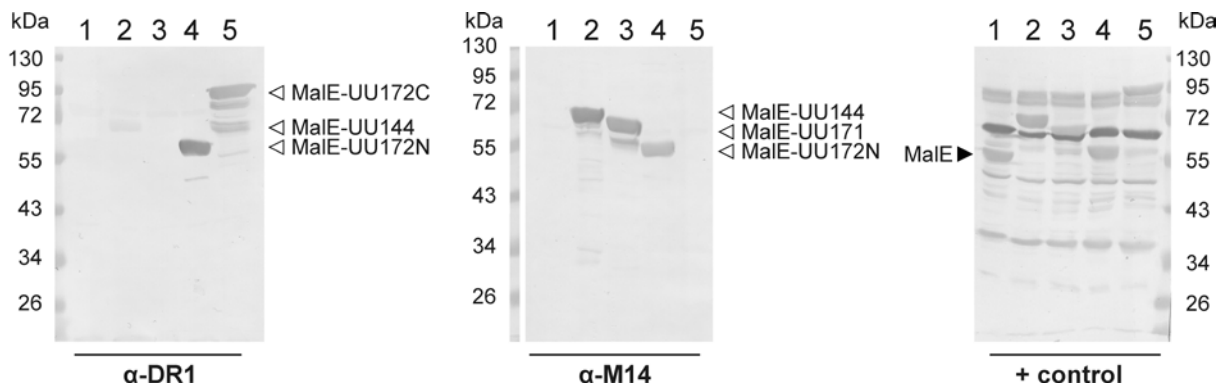

**Fig. S5** Western blot with total protein from *E. coli* clones and anti-*Ureaplasma* hyperimmune antisera.

*E. coli* clones contained pMal™-c2X (NewEnglandBiolabs) plasmids, over-expressing the following fusion proteins: Lane 1, maltose binding protein (MalE), lane 2, MalE-UU144, lane 3, MalE-UU171, lane 4, MalE-UU172N and lane 5, MalE-UU172C. Proteins were detected with hyperimmune antisera as indicated below the blots. As positive control, a hyperimmune antiserum was used that detected MalE and a variety of *E. coli* proteins.

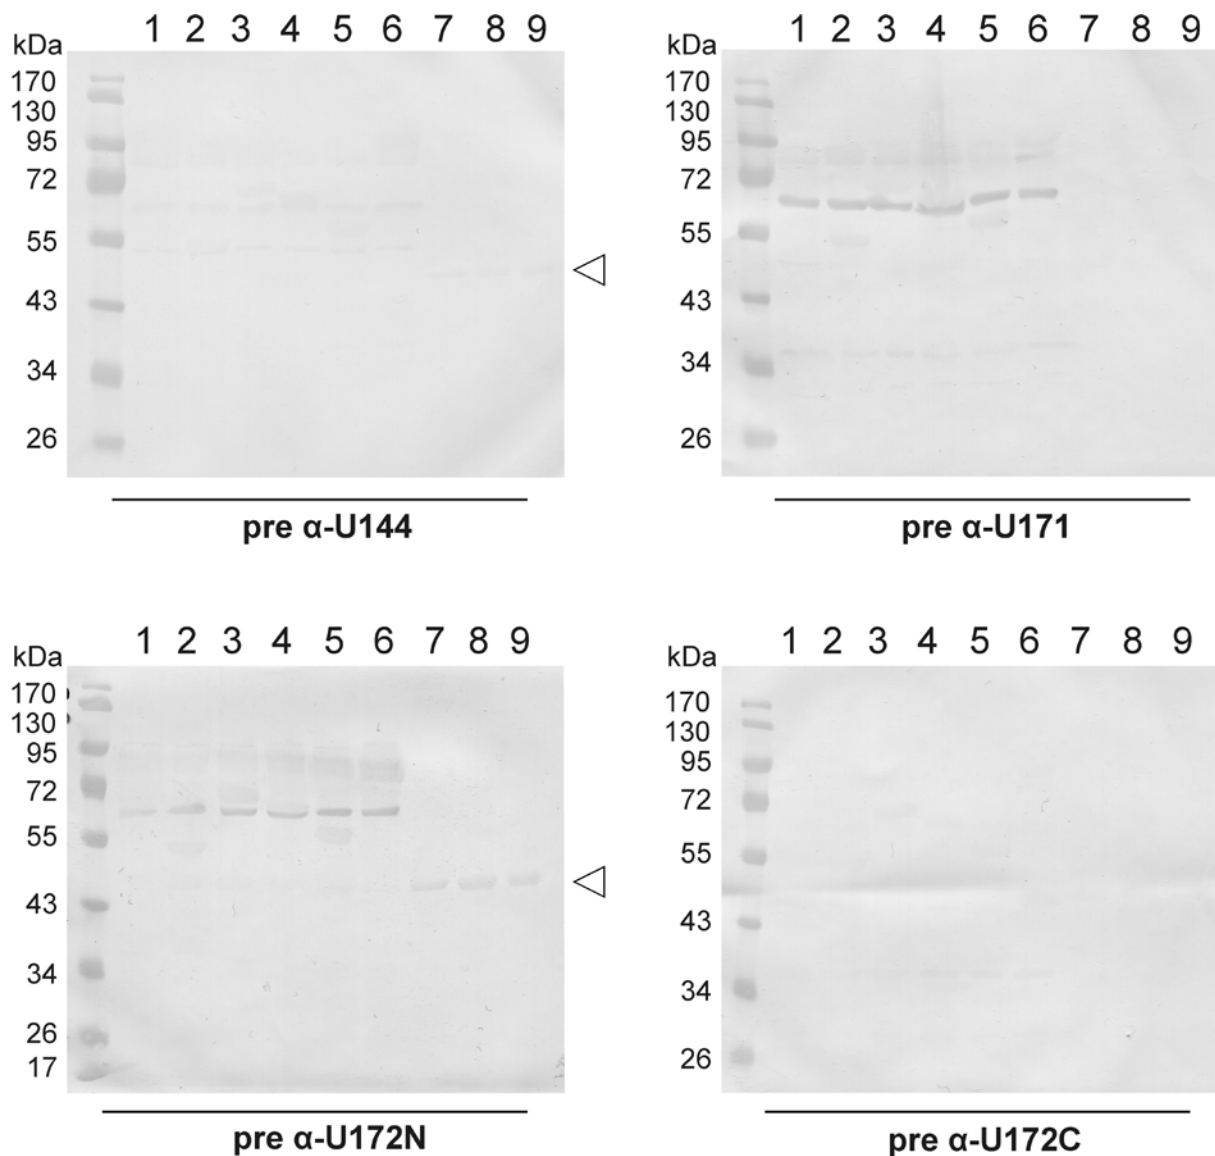

**Fig. S6** Western blot analysis with pre-immune sera and total protein from *E. coli* clones and total *Ureaplasma* protein from *U. parvum* serovar 3 clonal variants.

*E. coli* clones contained pMal™-c2X (NewEnglandBiolabs) plasmids, over-expressing the following fusion proteins:

Lane 1, no over-expression, lane 2, maltose binding protein (MalE), lane 3, MalE-UU144, lane 4, MalE-UU171, lane 5, MalE-UU172N and lane 6, MalE-UU172C.

Total *Ureaplasma* protein was separated in lanes 7-9; lane 7, DR1-K1, lane 8, 27815<sup>T</sup>-K5, and lane 9, M14-K16. Proteins were detected with antisera as indicated below the blots. Open triangle: background bands detecting protein from *Ureaplasma* protein preparations, which also appear in Western blots with monospecific polyclonal antibodies.
